# Supplementary material for: Commensal oral microbiota induces osteoimmunomodulatory effects separate from systemic microbiome in mice
Source: PubMed Central journal article supplement (PMC8876522; doi:10.1172/jci.insight.140738), 2022-02-22
Supplement: jciinsight-7-140738-s165.pdf [file jciinsight-7-140738-s165.pdf]

**Supplemental Table 1: Flow Cytometry Antibodies**

| <b>Cell Type</b>                   | <b>Tissue</b> | <b>Cell<br/>Marker</b> | <b>Fluorescent<br/>Tag</b> | <b>Vendor</b> | <b>Clone</b>  |
|------------------------------------|---------------|------------------------|----------------------------|---------------|---------------|
| <i>Monocytes /<br/>Neutrophils</i> | CLNs          | CD11b                  | APC                        | Miltenyi      | M1/70.15.11.5 |
|                                    |               | Ly6G                   | PacB                       | Biolegend     | 18A           |
|                                    |               | Ly6C                   | FITC                       | Novus Bio.    | HK1.4         |
|                                    |               | F4/80                  | PE                         | eBioscience   | BM8           |
| <i>Macrophages<br/>(M1s, M2s)</i>  | CLNs          | CD11b                  | APC                        | Miltenyi      | REA592        |
|                                    |               | CD68                   | PE-Vio770                  | Miltenyi      | REA835        |
|                                    |               | MHC II                 | FITC                       | Miltenyi      | REA528        |
|                                    |               | CD64                   | PE                         | eBioscience   | MR6F3         |
|                                    |               | CD206                  | APC-Vio770                 | Miltenyi      | REA286        |
| <i>T-cells</i>                     | ABM, LBM      | CD3                    | APC-Vio770                 | Miltenyi      | REA641        |
|                                    |               | CD4                    | VioBlue                    | Miltenyi      | REA604        |
|                                    |               | CD8                    | VioGreen                   | Miltenyi      | REA601        |
|                                    |               | CD62L                  | PerCP-Cy5.5                | Thermofisher  | MEL-14        |
|                                    |               | CD45                   | AF700                      | Miltenyi      | 30-F11        |
|                                    |               | CD44                   | FITC                       | Miltenyi      | REA664        |
|                                    |               | CD28                   | PE                         | Miltenyi      | REA806        |
| <i>Dendritic cells</i>             | ABM, LBM      | CD45                   | AF700                      | Thermofisher  | 30-F11        |
|                                    |               | CD11b                  | PE-Vio770                  | Miltenyi      | REA592        |
|                                    |               | CD11c                  | VioBlue                    | Miltenyi      | REA754        |
|                                    |               | B220                   | PerCP-Cy5.5                | Thermofisher  | RA3-6B2       |
|                                    |               | CD8                    | APC-Vio770                 | Miltenyi      | REA601        |

|                                   |          |          |             |              |         |
|-----------------------------------|----------|----------|-------------|--------------|---------|
|                                   |          | MHC II   | VioGreen    | Miltenyi     | REA813  |
|                                   |          | CD86     | APC         | Miltenyi     | REA1190 |
|                                   |          | Siglec-H | FITC        | Miltenyi     | REA819  |
| <i>B-cells</i>                    | ABM, LBM | CD45     | PE-Vio770   | Miltenyi     | REA737  |
|                                   |          | CD19     | VioBlue     | Miltenyi     | REA749  |
|                                   |          | B220     | PerCP-Cy5.5 | Thermofisher | RA3-6B2 |
|                                   |          | MHC II   | VioGreen    | Miltenyi     | REA813  |
|                                   |          | IgM      | FITC        | Miltenyi     | REA979  |
|                                   |          | CD3      | APC-Vio770  | Miltenyi     | REA641  |
|                                   |          | CD86     | APC         | Miltenyi     | REA1190 |
| <i>Macrophages<br/>(M1s, M2s)</i> | ABM, LBM | CD45     | APC-Vio770  | Miltenyi     | REA737  |
|                                   |          | CD11b    | PE-Vio770   | Miltenyi     | REA592  |
|                                   |          | CD11c    | VioBlue     | Miltenyi     | REA754  |
|                                   |          | F4/80    | PE-Cy5      | Thermofisher | BM8     |
|                                   |          | MHC II   | VioGreen    | Miltenyi     | REA813  |
|                                   |          | CD64     | PE          | Miltenyi     | REA286  |
|                                   |          | CD86     | APC         | Miltenyi     | REA1190 |
|                                   |          | CD206    | AF700       | Thermofisher | MR6F3   |
| <i>T<sub>H</sub>1 cells</i>       | ABM, LBM | CD3      | APC-Vio770  | Miltenyi     | REA641  |
|                                   |          | CD4      | VioBlue     | Miltenyi     | REA604  |
|                                   |          | CD8      | VioGreen    | Miltenyi     | REA601  |
|                                   |          | CD183    | FITC        | Miltenyi     | REA724  |
|                                   |          | Tbet     | APC         | Miltenyi     | REA102  |
| <i>T<sub>H</sub>17 cells</i>      | ABM, LBM | CD3      | APC-Vio770  | Miltenyi     | REA641  |

|                              |                  |           |            |              |         |
|------------------------------|------------------|-----------|------------|--------------|---------|
|                              |                  | CD4       | VioBlue    | Miltenyi     | REA604  |
|                              |                  | CD196     | PE         | Miltenyi     | REA227  |
|                              |                  | RORgT     | APC        | Miltenyi     | REA278  |
| <i>T<sub>H</sub>2 cells</i>  | ABM, LBM         | CD3       | APC-Vio770 | Miltenyi     | REA641  |
|                              |                  | CD4       | VioBlue    | Miltenyi     | REA604  |
|                              |                  | GATA3     | AF700      | Thermofisher | TWAJ    |
|                              |                  | IRF4      | PE-Vio770  | Miltenyi     | REA201  |
| <i>T<sub>REG</sub> cells</i> | ABM, LBM         | CD3       | APC-Vio770 | Miltenyi     | REA641  |
|                              |                  | CD4       | VioBlue    | Miltenyi     | REA604  |
|                              |                  | CD8       | VioGreen   | Miltenyi     | REA601  |
|                              |                  | CD25      | PE-Vio770  | Miltenyi     | REA570  |
|                              |                  | FoxP3     | PE         | Miltenyi     | REA788  |
| <i>Dendritic cells</i>       | In vitro studies | CD11c     | VioBlue    | Miltenyi     | REA754  |
|                              |                  | MHC II    | VioGreen   | Miltenyi     | REA813  |
|                              |                  | CD86      | APC        | Miltenyi     | REA1190 |
| <i>T-cells</i>               | In vitro studies | CD3       | APC-Vio770 | Miltenyi     | REA641  |
|                              |                  | CD4       | VioBlue    | Miltenyi     | REA604  |
|                              |                  | CD28      | PE         | Miltenyi     | REA806  |
| Live/Dead fixable stain      | All studies      | Live/dead | Qdot605    | Thermofisher | N/A     |

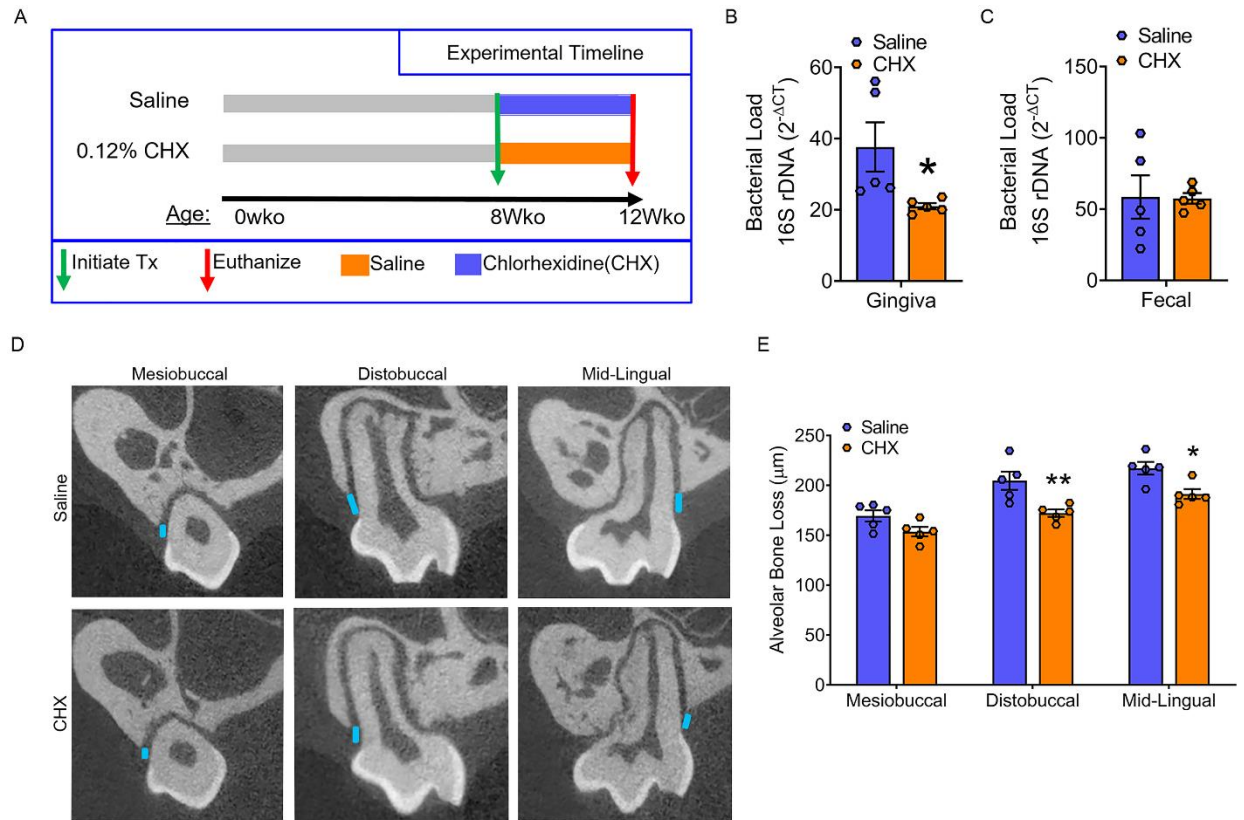

**Supplemental Figure 1. Four-week treatment with CHX oral rinse suppresses commensal oral microbiota and protects from alveolar bone loss.** (A) Experimental timeline of SPF mice treated with CHX vs. Saline oral rinse from age 8 to 12 weeks. (B-C) 16S rDNA analysis of bacterial load for (B) maxillary gingiva and (C) fecal pellets; data reported as  $2^{-\Delta C_T}$ ;  $n=5/gp$ . (D-E) Alveolar bone loss was assessed by evaluating the linear distance between the cemento-enamel junction (CEJ) and alveolar bone crest (ABC) at the maxillary first molar in reconstructed micro-CT images. (D) Representative micro-CT images displaying CEJ-ABC linear distance (blue line) at the mesiobuccal, distobuccal, and mid-lingual aspect of the maxillary first molar. (E) Quantitative measures of CEJ-ABC linear distance at the mesiobuccal, distobuccal, and mid-lingual aspect of the maxillary first molar;  $n=5/gp$ . Unpaired  $t$ -test; data presented as mean  $\pm$  SEM; \* $p<0.05$ , \*\* $p<0.01$ .

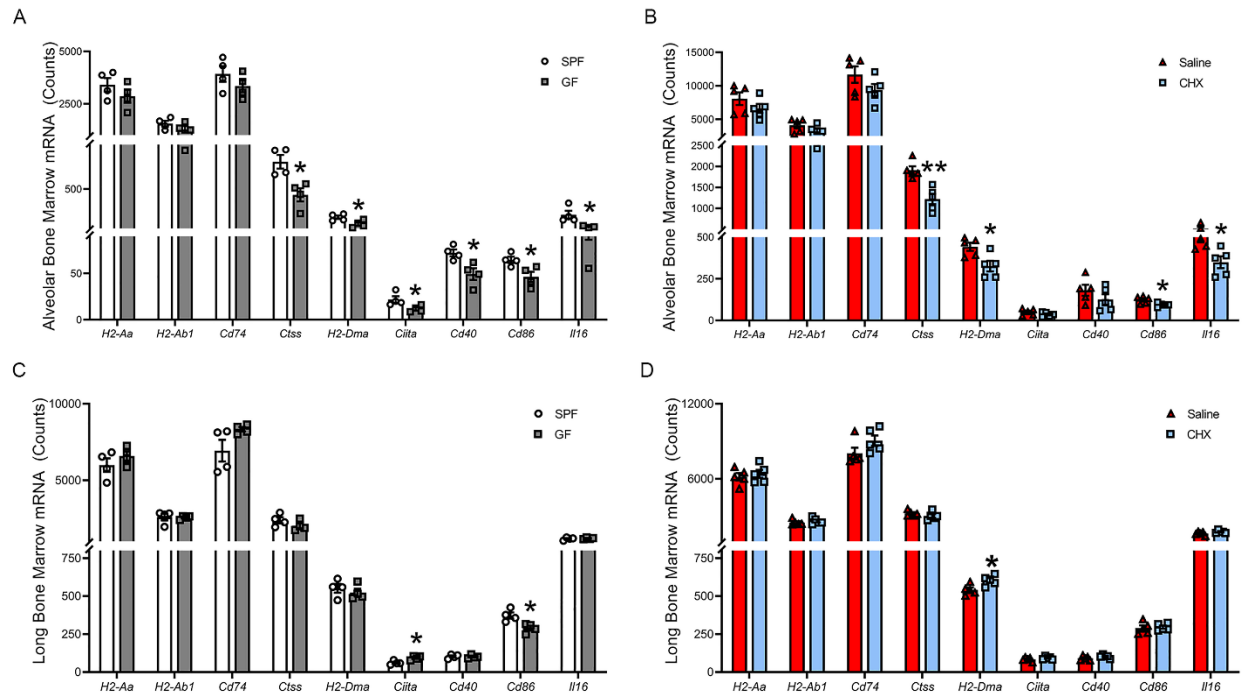

**Supplemental Figure 2. Commensal oral microbiota has immunomodulatory effects to induce MHC II antigen presentation genes in alveolar bone marrow.** (A-B) nCounter analysis was performed to assess MHC II antigen processing and presentation genes in alveolar bone marrow from (A) SPF vs. GF mice (n=4/gp) and (B) Saline vs. CHX mice (n=6/gp). Data presented as mRNA counts. (C-D) nCounter analysis evaluated MHC II antigen processing and presentation genes in long bone marrow from (C) SPF vs. GF mice (n=4/gp) and (D) Saline vs. CHX mice (n=6/gp). Data presented as mRNA counts. Unpaired *t*-test; data reported as mean  $\pm$  SEM; \**p*<0.05, \*\**p*<0.01.

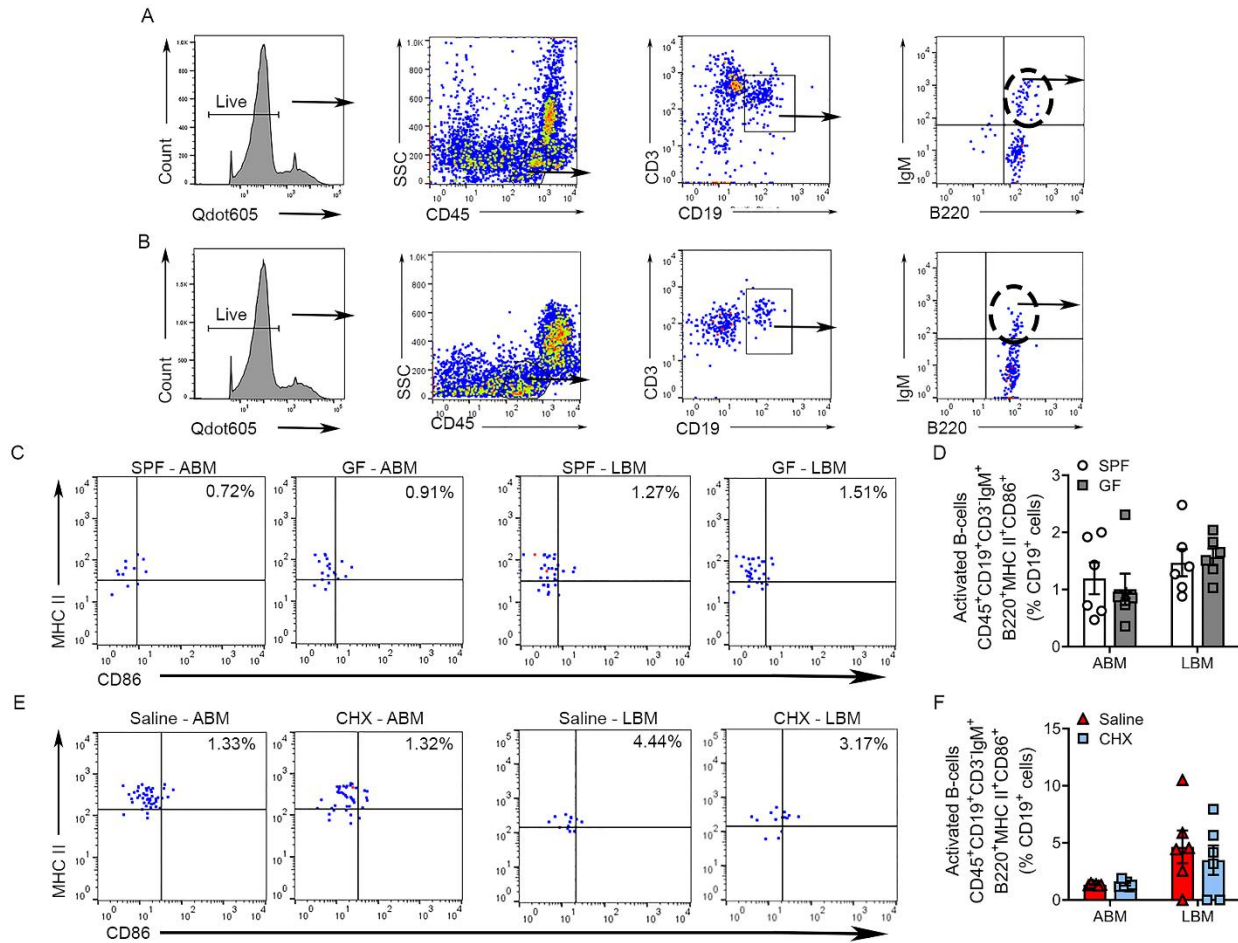

**Supplemental Figure 3. Commensal oral microbiota did not alter B-cell activation in alveolar bone marrow.** Flow cytometric analysis of activated B-cells in the alveolar bone marrow (ABM) and long bone marrow (LBM), reported as % CD19<sup>+</sup> cells; n=6/gp. **(A-B)** Representative gating strategy for activated B-cells in **(A)** ABM and **(B)** LBM. **(C-D)** Representative dot plots and **(D)** quantitation for CD45<sup>+</sup>CD19<sup>+</sup>CD3<sup>+</sup>IgM<sup>+</sup>B220<sup>+</sup>MHC II<sup>+</sup>CD86<sup>+</sup> activated B-cells in ABM and LBM of SPF vs. GF mice. **(E)** Representative dot plots and **(F)** quantitation for CD45<sup>+</sup>CD19<sup>+</sup>CD3<sup>+</sup>IgM<sup>+</sup>B220<sup>+</sup>MHC II<sup>+</sup>CD86<sup>+</sup> activated B-cells in ABM and LBM of Saline vs. CHX mice. Unpaired *t*-test; data are presented as mean ± SEM.

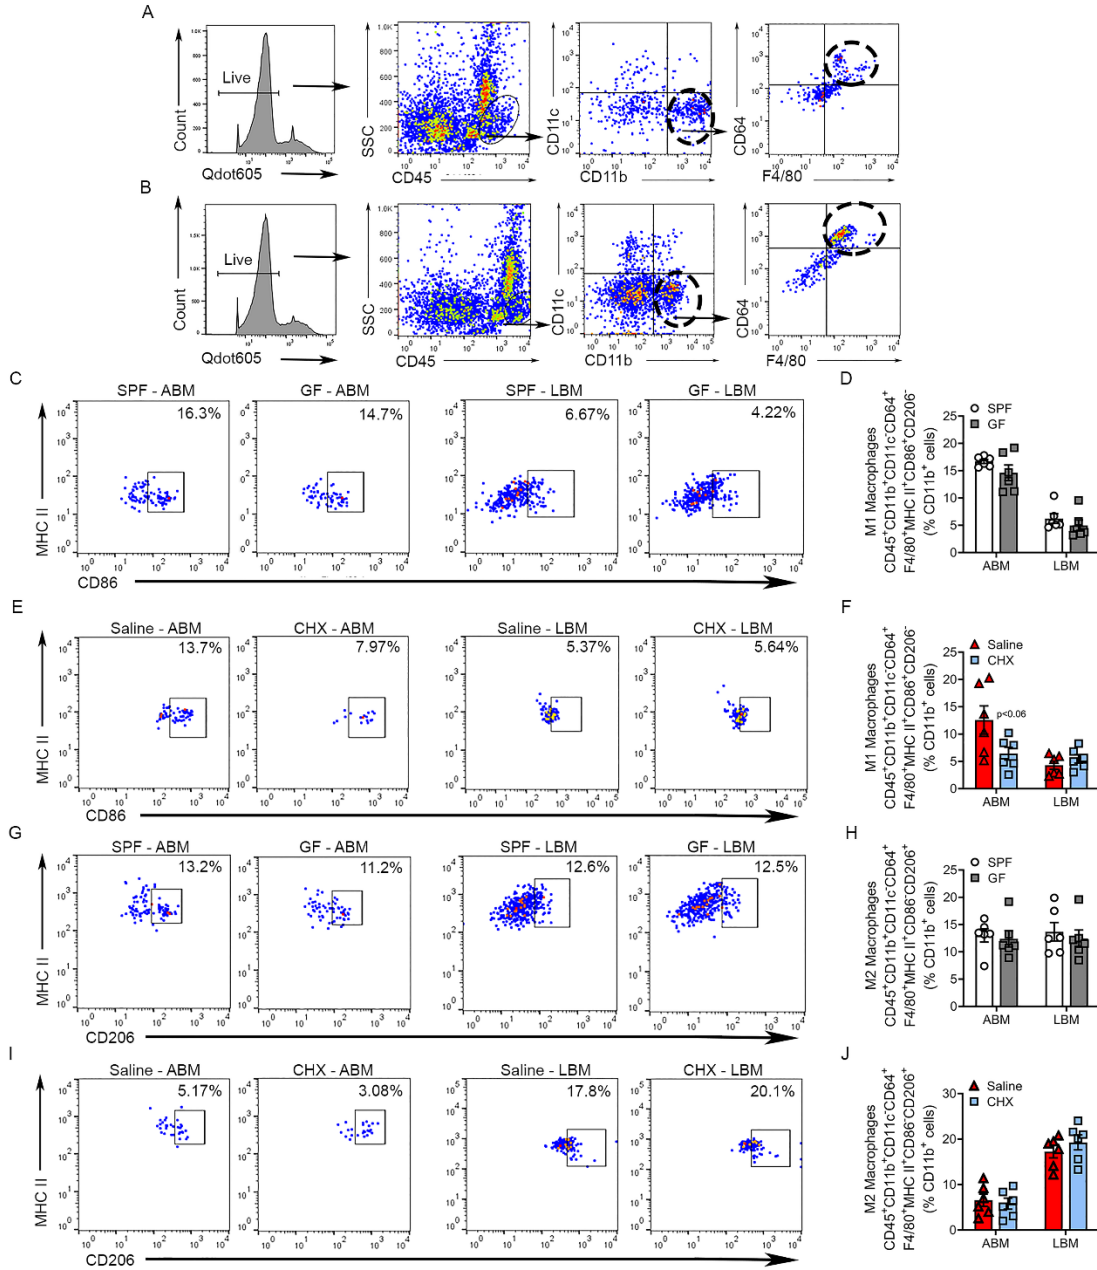

**Supplemental Figure 4. Commensal microbiota effects on M1/M2 macrophages in oral and non-oral bone marrow.** Flow cytometric analysis of M1 and M2 macrophages in the alveolar bone marrow (ABM) and long bone marrow (LBM), reported as % CD11b<sup>+</sup> cells; n=6/gp. (A-B) Representative gating strategy for macrophages in (A) ABM and (B) LBM. (C) Representative dot plots and (D) quantitation for CD45<sup>+</sup>CD11b<sup>+</sup>CD11c<sup>-</sup>CD64<sup>+</sup>F4/80<sup>+</sup>MHC II<sup>+</sup>CD86<sup>+</sup>CD206<sup>-</sup> M1 macrophages in ABM and LBM of SPF vs. GF mice. (E) Representative dot plots and (F) quantitation for CD45<sup>+</sup>CD11b<sup>+</sup>CD11c<sup>-</sup>CD64<sup>+</sup>F4/80<sup>+</sup>MHC II<sup>+</sup>CD86<sup>+</sup>CD206<sup>-</sup> M1 macrophages in ABM and LBM of Saline vs. CHX mice. (G) Representative dot plots and (H) quantitation for CD45<sup>+</sup>CD11b<sup>+</sup>CD11c<sup>-</sup>CD64<sup>+</sup>F4/80<sup>+</sup>MHC II<sup>+</sup>CD86<sup>+</sup>CD206<sup>+</sup> M2 macrophages in ABM and LBM of SPF vs. GF mice. (I) Representative dot plots and (J) quantitation for CD45<sup>+</sup>CD11b<sup>+</sup>CD11c<sup>-</sup>CD64<sup>+</sup>F4/80<sup>+</sup>MHC II<sup>+</sup>CD86<sup>+</sup>CD206<sup>+</sup> M2 macrophages in ABM and LBM of Saline vs. CHX mice. Unpaired *t*-test; data presented as mean ± SEM.

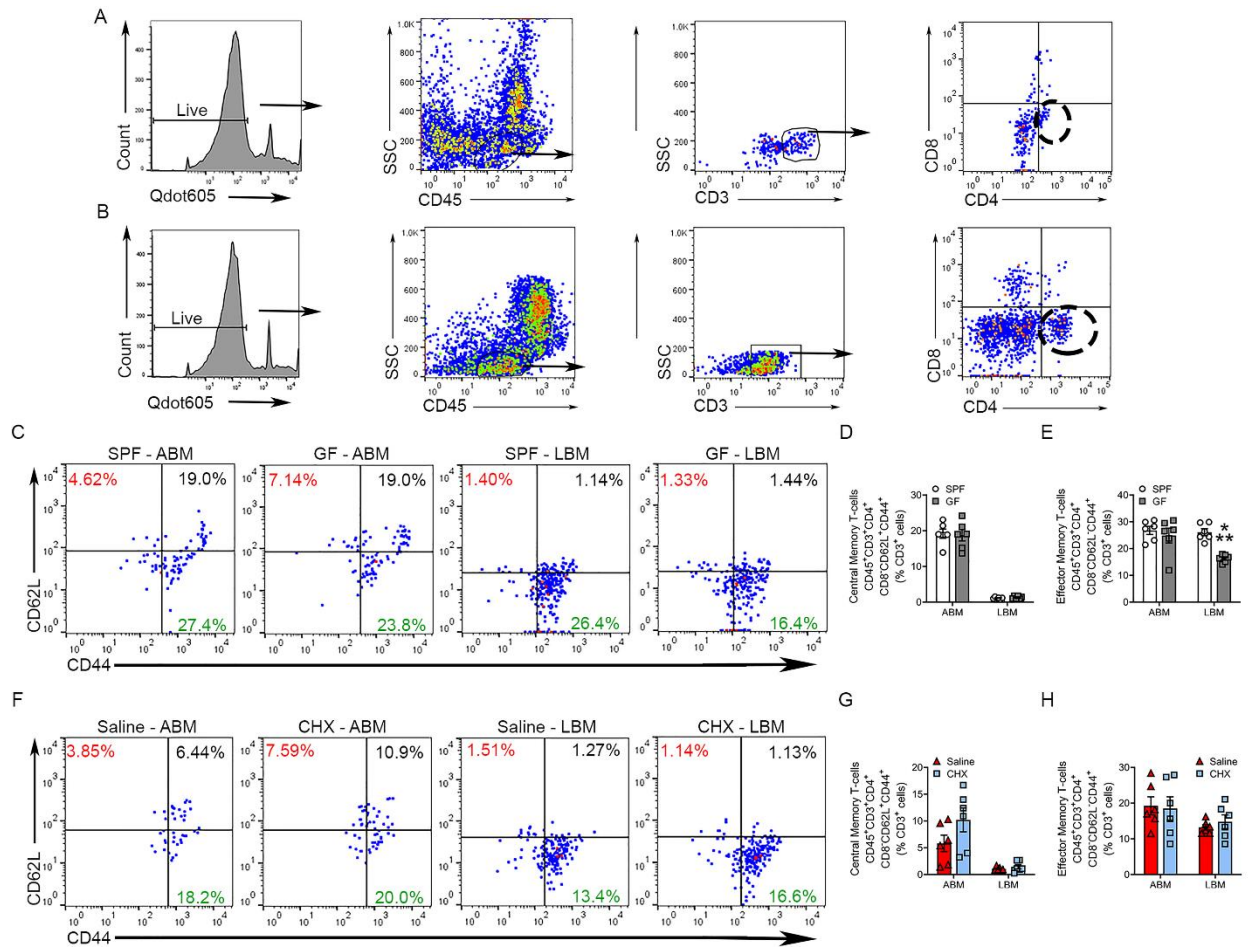

**Supplemental Figure 5. Commensal microbiota effects on central and effector memory CD4<sup>+</sup> T-cells in oral and non-oral bone marrow.** Flow cytometric analysis of CD4<sup>+</sup> helper T-cell cells in the alveolar bone marrow (ABM) and long bone marrow (LBM), reported as % CD3<sup>+</sup> cells; n=6/gp. **(A-B)** Representative gating strategy for CD4<sup>+</sup> T-cells in **(A)** ABM and **(B)** LBM. **(C)** Representative dot plots and quantitation for **(D)** CD45<sup>+</sup>CD3<sup>+</sup>CD4<sup>+</sup>CD8<sup>-</sup>CD62L<sup>+</sup>CD44<sup>+</sup> central memory T-cells (Upper right; black %) and **(E)** CD45<sup>+</sup>CD3<sup>+</sup>CD4<sup>+</sup>CD8<sup>-</sup>CD62L<sup>-</sup>CD44<sup>+</sup> effector memory T-cells (Lower right; green %) in ABM and LBM of SPF vs. GF mice. **(F)** Representative dot plots and quantitation for **(G)** CD45<sup>+</sup>CD3<sup>+</sup>CD4<sup>+</sup>CD8<sup>-</sup>CD62L<sup>+</sup>CD44<sup>+</sup> central memory T-cells (Upper right; black %) and **(H)** CD45<sup>+</sup>CD3<sup>+</sup>CD4<sup>+</sup>CD8<sup>-</sup>CD62L<sup>-</sup>CD44<sup>+</sup> effector memory T-cells (Lower right; green %) in ABM and LBM of Saline vs. CHX mice. Unpaired *t*-test; data presented as mean ± SEM; \*\*\**p*<0.001.



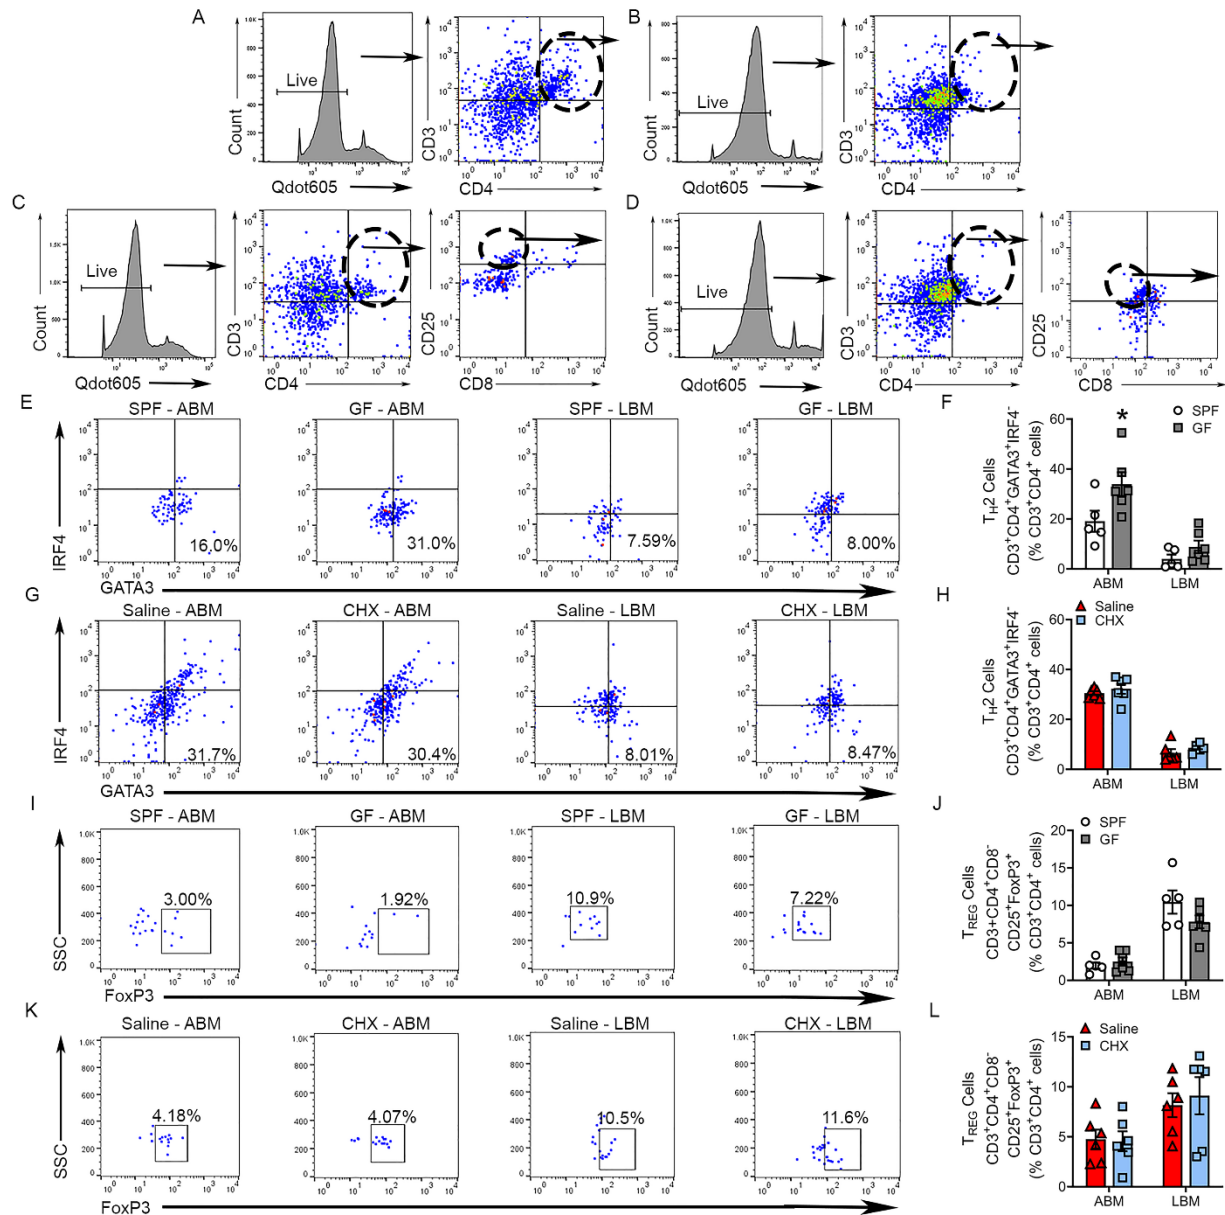

**Supplemental Figure 6. Commensal microbiota effects on TH2 and TREG cells in oral and non-oral bone marrow.** Flow cytometric analysis of CD4<sup>+</sup> helper T-cell subsets in the alveolar bone marrow (ABM) and long bone marrow (LBM), reported as % CD3<sup>+</sup>CD4<sup>+</sup> cells; n=5-6/gp. (A-B) Representative gating strategy for TH2 cells in (A) ABM and (B) LBM. (C-D) Representative gating strategy for TREG cells in (C) ABM and (D) LBM. (E) Representative dot plots and (F) quantitation for CD3<sup>+</sup>CD4<sup>+</sup>GATA3<sup>+</sup>IRF4<sup>+</sup> TH2 cells in ABM and LBM of SPF vs. GF mice. (G) Representative dot plots and (H) quantitation for CD3<sup>+</sup>CD4<sup>+</sup>GATA3<sup>+</sup>IRF4<sup>+</sup> TH2 cells in ABM and LBM of Saline vs. CHX mice. (I) Representative dot plots and (J) quantitation for CD3<sup>+</sup>CD4<sup>+</sup>CD8<sup>-</sup>CD25<sup>+</sup>FoxP3<sup>+</sup> TREG cells in ABM and LBM of SPF vs. GF mice. (K) Representative dot plots and (L) quantitation for CD3<sup>+</sup>CD4<sup>+</sup>CD8<sup>-</sup>CD25<sup>+</sup>FoxP3<sup>+</sup> TREG cells in ABM and LBM of Saline vs. CHX mice. Unpaired *t*-test; data presented as mean ± SEM; \**p*<0.05.

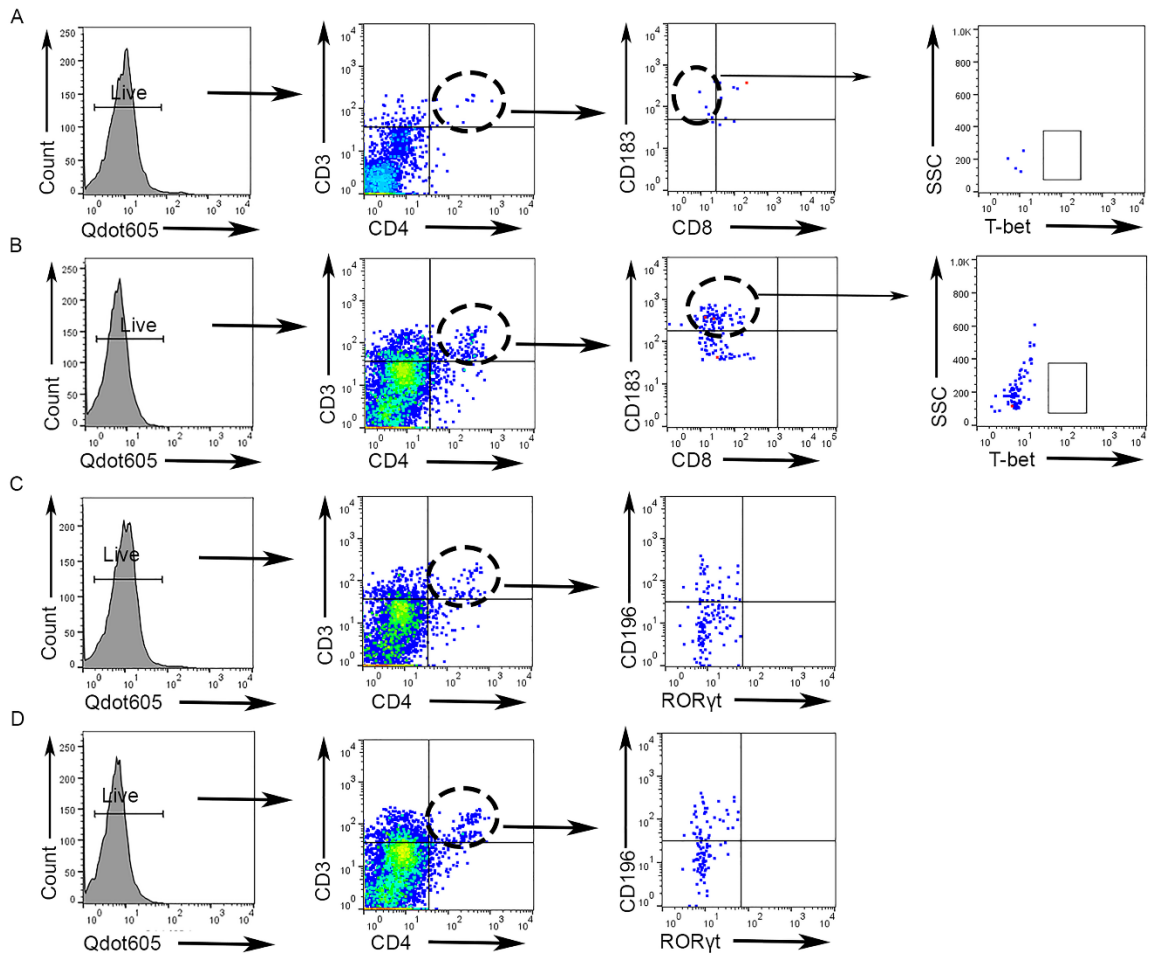

**Supplemental Figure 7. Fluorescence Minus One (FMO) controls for T-bet and RORyt. (A-B)** Flow cytometric analysis of TH1 antibody markers without staining for T-bet. Representative gating strategy for TH1 cells in (A) ABM and (B) LBM. (C-D) Flow cytometric analysis of TH17 antibody markers without staining for RORyt. Representative gating strategy for TH17 cells in (A) ABM and (B) LBM.
